# Supplementary material for: Global Risk Maps of Climate Change Impacts on the Distribution of Acinetobacter baumannii Using GIS
Source: MDPI journal article supplement (doi:10.3390/microorganisms11092174), 2023-08-28
Supplement: s1 [file s1]

**Table S1. The 19 bioclimatic variables used to generate the prediction distribution maps of *A. baumannii***

| <b>variable</b> | <b>Description</b>                               |
|-----------------|--------------------------------------------------|
| Bio 1           | Annual mean temperature                          |
| Bio 2           | Mean diurnal range                               |
| Bio 3           | Isothermality (bio2\bio 7) (*100)                |
| Bio 4           | Temperature seasonality (standard deviation*100) |
| Bio 5           | Maximum temperature of the warmest month         |
| Bio 6           | Minimum temperature of the coldest month         |
| Bio 7           | Temperature annual range                         |
| Bio 8           | The mean temperature of the wettest quarter      |
| Bio 9           | The mean temperature of the driest quarter       |
| Bio 10          | The mean temperature of the warmest quarter      |
| Bio 11          | The mean temperature of the coldest quarter      |
| Bio 12          | Annual precipitation                             |
| Bio 13          | Precipitation of the wettest month               |
| Bio 14          | Precipitation of the driest month                |
| Bio 15          | Precipitation seasonality                        |
| Bio 16          | Precipitation of the wettest quarter             |
| Bio 17          | Precipitation of the driest quarter              |
| Bio 18          | Precipitation of the warmest quarter             |
| Bio 19          | Precipitation of the coldest quarter             |
