# Supplementary material for: Global Risk Maps of Climate Change Impacts on the Distribution of Acinetobacter baumannii Using GIS
Source: MDPI journal article supplement (doi:10.3390/microorganisms11092174), 2023-08-28
Supplement: s1 [file s1]

**Figure S1: Environmental envelope model of recorded points of *A. baumannii*, the envelope showing the wide range of annual precipitation (bio\_12) and annual mean temperature (bio\_1).**

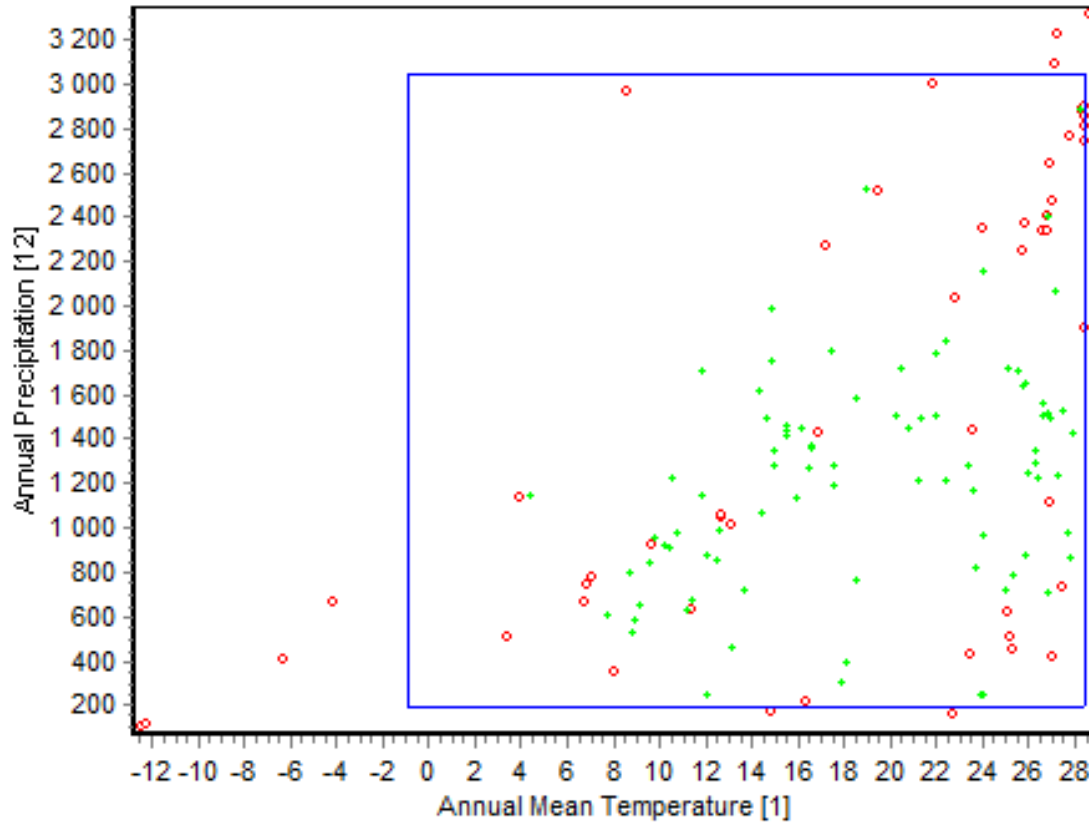

\* The test done using DIVA-GIS V7.1
